# Supplementary material
Source: HighWire-hosted journal article supplement (https://www.jrheum.org/highwire/filestream/37405/field_highwire_adjunct_files/0/190407DataSuppl.pdf)
Supplement: 190407DataSuppl.pdf [file 190407DataSuppl.pdf]

**ONLINE SUPPLEMENTARY DATA**

**Supplementary Table 1. Symptoms of TAK patients with and without SIE at diagnosis**

| <b>Features</b>             | <b>With SIE<br/>n=15</b> | <b>Without SIE<br/>n=37</b> | <b>p-value</b> |
|-----------------------------|--------------------------|-----------------------------|----------------|
| <b>Presenting symptoms</b>  |                          |                             |                |
| Systemic Symptoms           | 10 (67)                  | 32 (87)                     | 0.17           |
| Fatigue                     | 6 (40)                   | 17 (46)                     | 0.77           |
| Weight loss > 5kg           | 0                        | 8 (22)                      | 0.07           |
| Fever                       | 1 (7)                    | 4 (11)                      | 0.66           |
| Night sweats                | 3 (20)                   | 3 (8)                       | 0.25           |
| Rheumatic                   | 6 (40)                   | 17 (46)                     | 0.69           |
| Arthralgia                  | 5 (33)                   | 10 (27)                     | 0.70           |
| Myalgia                     | 1 (7)                    | 7 (19)                      | 0.31           |
| Ocular                      | 3 (20)                   | 5 (14)                      | 0.56           |
| Amurosis fugax              | 1 (7)                    | 0                           | 0.11           |
| Episcleritis                | 1 (7)                    | 2 (5)                       | 0.86           |
| Optic neuritis              | 0                        | 1 (3)                       | 0.52           |
| Neurologic                  | 5 (33)                   | 12 (32)                     | 0.92           |
| Stroke                      | 2 (13)                   | 0                           | 0.02           |
| TIA                         | 3 (20)                   | 0                           | 0.005          |
| Light-Headedness            | 1 (7)                    | 3 (8)                       | 0.86           |
| Headache                    | 2 (13)                   | 12 (32)                     | 0.95           |
| Seizure                     | 0                        | 1 (3)                       | 0.52           |
| Cognitive impairment        | 1 (7)                    | 0                           | 0.11           |
| Cranial nerve palsy         | 0                        | 1 (3)                       | 0.52           |
| Cardiovascular              | 15 (100)                 | 37 (100)                    | 1.00           |
| Myocardial infarction       | 5 (33)                   | 0                           | 0.0002         |
| Ischemic cardiomyopathy     | 1 (7)                    | 0                           | 0.11           |
| Non-ischemic cardiomyopathy | 1 (7)                    | 2 (5)                       | 0.85           |
| Angina                      | 2 (13)                   | 0                           | 0.02           |
| Syncope                     | 1 (7)                    | 4 (11)                      | 0.6            |
| Hypertension                | 3 (20)                   | 15 (41)                     | 0.16           |
| Blood pressure discrepancy  | 10 (67)                  | 24 (65)                     | 0.9            |
| Arrhythmia                  | 0                        | 2 (5)                       | 0.35           |
| Congestive Heart Failure    | 0                        | 1 (3)                       | 0.52           |
| Valvular Disease            | 3 (20)                   | 4 (11)                      | 0.37           |
| Arterial Thrombosis         | 3 (20)                   | 3 (8)                       | 0.52           |
| Venous Thrombosis           | 0                        | 1 (3)                       | 0.22           |
| Claudication                | 7 (47)                   | 17 (46)                     | 0.96           |
| Cutaneous                   | 7 (47)                   | 4 (11)                      | 0.004          |
| Ischemic limb               | 4 (27)                   | 0                           | 0.001          |
| Rash                        | 0                        | 1 (3)                       | 0.52           |
| Purpura, petechiae          | 0                        | 0                           | N/A            |

|                               |         |         |       |
|-------------------------------|---------|---------|-------|
| Raynaud's                     | 1 (7)   | 0       | 0.11  |
| Oral ulcers                   | 2 (13)  | 2 (5)   | 0.35  |
| Livedo reticularis            | 2 (13)  | 0       | 0.02  |
| Gastrointestinal              | 1 (7)   | 1 (3)   | 0.50  |
| Abdomen pain                  | 1 (7)   | 2 (5)   | 0.86  |
| Genitourinary                 | 0       | 1 (3)   | 0.52  |
| Respiratory                   | 5 (33)  | 4 (11)  | 0.05  |
| Dyspnea                       | 5 (33)  | 2 (5)   | 0.007 |
| <b>Vascular Involvement</b>   |         |         |       |
| Carotid*                      | 6 (40)  | 27 (73) | 0.03  |
| Aorta                         | 10 (67) | 28 (76) | 0.51  |
| Subclavian*                   | 8 (53)  | 30 (81) | 0.04  |
| Mesenteric (celiac, SMA, IMA) | 6 (40)  | 11 (30) | 0.48  |
| Renal                         | 5 (33)  | 12 (32) | 0.92  |
| Pulmonary                     | 0       | 5 (14)  | 0.14  |
| Coronary <sup>†</sup>         | 5 (33)  | 0       |       |
| Upper extremity               | 4 (27)  | 8 (22)  | 0.69  |

Data are presented as numbers (%).

\*For patients with stroke or TIA, 4/5 (80%) had carotid and subclavian involvement ( $p > 0.05$ ) compared to patients without SIE

<sup>†</sup>The only patients undergoing coronary artery imaging were those with SIE  
SIE=severe ischemic events; TIA=transient ischemic attack

**Supplementary Table 2. Imaging findings at follow-up in SIE and Non-SIE patients**

| <b>Imaging at 6 months</b> | <b>With SIE<br/>n =5</b> | <b>Without SIE<br/>n=12</b> | <b>p-value</b> |
|----------------------------|--------------------------|-----------------------------|----------------|
| Unchanged lesions          | 1                        | 4                           | 0.58           |
| Improved lesions           | 1                        | 2                           | 0.87           |
| Worse lesions              | 3                        | 6                           | 0.71           |

  

| <b>Imaging at 12 months</b> | <b>With SIE<br/>n=2</b> | <b>Without SIE<br/>n=16</b> | <b>p-value</b> |
|-----------------------------|-------------------------|-----------------------------|----------------|
| Unchanged lesions           | 1                       | 10                          | 0.73           |
| Improved lesions            | 1                       | 2                           | 0.18           |
| Worse lesions               | 0                       | 4                           | 0.42           |

  

| <b>Imaging at last follow up</b> | <b>With SIE<br/>n=5</b> | <b>Without SIE<br/>n=11</b> | <b>P-value</b> |
|----------------------------------|-------------------------|-----------------------------|----------------|
| Unchanged lesions                | 4                       | 8                           | 0.76           |
| Improved lesions                 | 1                       | 1                           | 0.54           |
| Worse lesions                    | 0                       | 2                           | 0.31           |

**Supplementary Table 3. Immunosuppressants use at follow-up in SIE and Non-SIE patients**

| <b>Immunosuppressants use at diagnosis</b> | <b>With SIE<br/>n=15</b> | <b>Without SIE<br/>n=37</b> | <b>p-value</b> |
|--------------------------------------------|--------------------------|-----------------------------|----------------|
| Methotrexate                               | 4                        | 6                           | 0.43           |
| Azathioprine                               | 4                        | 2                           | <b>0.04</b>    |
| Mycophenolate mofetil                      | 0                        | 1                           | 0.52           |
| Cyclophosphamide                           | 1                        | 0                           | 0.11           |

  

| <b>Immunosuppressants use at 6 months</b> | <b>With SIE<br/>n=15</b> | <b>Without SIE<br/>n=36</b> | <b>p-value</b> |
|-------------------------------------------|--------------------------|-----------------------------|----------------|
| Methotrexate                              | 6                        | 17                          | 0.71           |
| Azathioprine                              | 4                        | 4                           | 0.2            |
| Mycophenolate mofetil                     | 0                        | 0                           | N/A            |
| Cyclophosphamide                          | 0                        | 1                           | 0.51           |

  

| <b>Immunosuppressants use at 12 months</b> | <b>With SIE<br/>n=13</b> | <b>Without SIE<br/>n=35</b> | <b>p-value</b> |
|--------------------------------------------|--------------------------|-----------------------------|----------------|
| Methotrexate                               | 8                        | 19                          | 0.6            |
| Azathioprine                               | 4                        | 4                           | 0.12           |
| Mycophenolate mofetil                      | 0                        | 1                           | 0.52           |
| Cyclophosphamide                           | 0                        | 1                           | 0.52           |
| Leflunomide                                | 0                        | 1                           | 0.52           |

  

| <b>Immunosuppressants use at last follow-up</b> | <b>With SIE<br/>n=13</b> | <b>Without SIE<br/>n=35</b> | <b>p-value</b> |
|-------------------------------------------------|--------------------------|-----------------------------|----------------|
| Methotrexate                                    | 5                        | 8                           | 0.31           |
| Azathioprine                                    | 3                        | 2                           | 0.13           |
| Mycophenolate mofetil                           | 0                        | 1                           | 0.5            |
| Cyclophosphamide                                | 0                        | 0                           | N/A            |
| Leflunomide                                     | 0                        | 4                           | 0.18           |
